# Supplementary material for: Selective removal of toxic organic dyes using Trӧger base-containing sulfone copolymers made from a metal-free thiol-yne click reaction followed by oxidation
Source: Royal Society of Chemistry journal article supplement (doi:10.1039/d1ra03783h), 2021-01-01
Supplement: d1ra03783h1.pdf [file d1ra03783h1.pdf]

## Supplementary Information

# Selective Removal of Toxic Organic Dyes Using Tröger Base-Containing Sulfone Copolymers Made from a Metal-Free Thiol-Yne Click Reaction Followed by Oxidation

Noorullah Baig<sup>a,b</sup>, Suchetha Shetty<sup>a,b</sup>, Moustafa Sherief Moustafa<sup>c</sup>, Saleh Al-Mousawi<sup>\*c</sup>, Bassam Alameddine<sup>\*a,b</sup>

<sup>a</sup> Department of Mathematics and Natural Sciences, Gulf University for Science and Technology, Kuwait.

<sup>b</sup> Functional Materials Group – CAMB, GUST, Kuwait.

<sup>c</sup> Department of Chemistry, University of Kuwait, Kuwait.

Tel: +965 2530 7476.

*E-mail address:* [alameddine.b@gust.edu.kw](mailto:alameddine.b@gust.edu.kw)

### Contents

|                                                             |                 |
|-------------------------------------------------------------|-----------------|
| Synthetic methods                                           | i-iii           |
| <sup>1</sup> H NMR spectrum of <b>TB-S</b> , <b>TCP1-6</b>  | Figure S1-S7    |
| <sup>13</sup> C NMR spectrum of <b>TB-S</b> , <b>TCP1-3</b> | Figure S8-S11   |
| GPC Chromatogram of <b>TCP1-3</b>                           | Figure S12-S14  |
| EI-HRMS of <b>TB-S</b> & <b>TB-SO2</b>                      | Figure S15- S16 |
| FTIR of <b>TB-S</b> & <b>TB-SO2</b>                         | Figure S17      |
| FTIR of <b>TCP1,4</b> ; <b>TCP3,6</b>                       | Figure S18, S19 |
| UV-Visible and emission of <b>TCP3,6</b>                    | Figure S20      |
| Methylene blue (MEB) dye adsorption by <b>TCP1,4</b>        | Figure S21      |
| Methylene blue (MEB) dye adsorption by <b>TCP2,5</b>        | Figure S22      |
| Summary of dye adsorption by copolymers <b>TCP1-6</b>       | Table S1        |
| Comparison of percentage removal of MEB                     | Table S2        |
| Re-usability of <b>TCP6</b>                                 | Figure S23      |

---

\*†Corresponding author. *E-mail address:* [alameddine.b@gust.edu.kw](mailto:alameddine.b@gust.edu.kw)

i). **Synthesis of 2,8-diiodo-4,10-dimethyl-6H,12H-5,11-methanodibenzo[b,f][1,5]diazocine:**

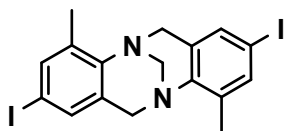

2-methyl-4-iodoaniline (2.32 g, 1mmol) was dissolved in trifluoroacetic acid (20 ml) and cooled in an ice bath. Dimethoxymethane (2.28 ml, 3 mmol) was added dropwise, and the reaction was stirred for 24 h. The reaction mixture was poured slowly into an aqueous ammonia solution (100 ml) and stirred thoroughly. The resulting precipitate was filtered and washed with water (500ml). The crude product was purified by column chromatography on silica gel with ethyl acetate/ petroleum ether (4:1, v/v) as an eluent to yield a white solid; yield 98%; mp. 218-20 °C; Anal. Calcd for C<sub>17</sub>H<sub>16</sub> I<sub>2</sub>N<sub>2</sub>: C, 40.66; H, 3.21; N, 5.58; I, 50.55. Found: C, 40.63; H, 3.23; N, 5.57; I, 50.56; EI-HRMS: m/z calculated for (M<sup>+</sup>) C<sub>17</sub>H<sub>16</sub>I<sub>2</sub>N<sub>2</sub> 501.9396 found 501.9397; <sup>1</sup>H NMR (600 MHz, DMSO-d<sub>6</sub>): δ = 7.38 (s, 2H, ArH), 7.16 (s, 2H, ArH), 4.43 (d, 2H, J = 18.0 Hz, methylene-CH), 4.18 (s, 2H, methylene-CH), 3.95 (d, 2H, J = 18.0 Hz, methylene-CH), 2.28 (s, 6H, methyl-CH); <sup>13</sup>C NMR (150 MHz, DMSO-d<sub>6</sub>): δ = 145.4, 137.7, 135.3, 132.8, 130.9, 87.8, 66.4, 53.5,

ii). **Synthesis of 4,10-dimethyl-2,8-bis((trimethylsilyl)ethynyl)-6,12-dihydro-5,11-methanodibenzo[b,f][1,5]diazocine**

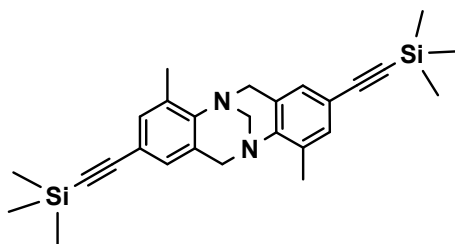

A Schlenk tube containing 2,8-diiodo-4,10-dimethyl-6H,12H-5,11-methanodibenzo[b,f][1,5]diazocine (5.02 g, 1 mmol), bis(triphenylphosphine)-palladium dichloride (0.35 g, 0.03 mmol), copper(I) iodide (0.19 g, 0.1 mmol), anhydrous triethylamine (10 ml) was deoxygenated and backfilled with argon. Then anhydrous toluene (100 ml) was added and backfilled with argon. Finally, under the flow of argon, trimethylsilylacetylene (1.068 ml, 1.2 mmol) was added drop wise and the mixture was stirred at room temperature for 24 hours. The crude product was purified by column chromatography on silica gel with ethyl acetate/ petroleum ether (4:1, v/v) as an eluent to yield a white solid; yield 56%; mp. 177-79 °C; Anal. Calcd. for  $C_{27}H_{34}N_2Si_2$ : C, 73.25; H, 7.74; N, 6.33; Si, 12.69. Found: C, 73.27; H, 7.72; N, 6.30; Si, 12.71; EI-HRMS:  $m/z$  calculated for ( $M^+$ )  $C_{27}H_{34}N_2Si_2$  442.2255 found 442.2258;  $^1H$  NMR (600 MHz,  $DMSO-d_6$ ):  $\delta$  = 7.12 (s, 2H, ArH), 6.93 (s, 2H, ArH), 4.44 (d, 2H, J = 12.0 Hz, methylene-CH), 4.20 (s, 2H, methylene-CH), 3.97 (d, 2H, J = 12.0 Hz, methylene-CH), 2.29 (s, 6H, methyl-CH), 0.16 (s, 18H, methyl-CH);  $^{13}C$  NMR (150 MHz,  $DMSO-d_6$ ):  $\delta$  = 146.51, 132.82, 131.52, 128.53, 128.02, 116.78, 105.42, 92.75, 66.69, 53.89, 16.47, 0.07.

iii). **Synthesis of 2,8-diethynyl-4,10-dimethyl-6,12-dihydro-5,11-methanodibenzo[b,f][1,5]diazocine (3a)**

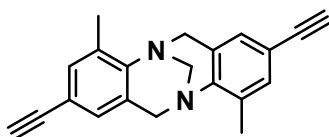

4,10-dimethyl-2,8-bis((trimethylsilyl)ethynyl)-6,12-dihydro-5,11-methanodibenzo[b,f][1,5]diazocine (4.42 g, 1 mmol) was dissolved in methanol (20 ml). Potassium carbonate (5.48 g, 4 mmol) was added, and the reaction mixture was stirred for 24 h. The mixture was poured slowly into ice cold water and stirred thoroughly. The precipitate was collected by filtration and purified by column chromatography on silica gel with ethyl acetate/ petroleum ether (4:1, v/v) as an eluent to yield a white solid; yield 95%; mp. 185-56 °C; Anal. Calcd for C<sub>21</sub>H<sub>18</sub>N<sub>2</sub>: C, 84.53; H, 6.08; N, 9.39. Found: C, 84.55; H, 6.10; N, 9.39; EI-HRMS: m/z calculated for (M<sup>+</sup>) C<sub>21</sub>H<sub>18</sub>N<sub>2</sub> 298.1464 found 298.1465; <sup>1</sup>H NMR (600 MHz, DMSO-d<sub>6</sub>): δ = 7.18 (s, 2H, ArH), 6.92 (s, 2H, ArH), 4.54 (d, 2H, J = 18.0 Hz, methylene-CH), 4.27 (s, 2H, methylene-CH), 3.96 (d, 2H, J = 18.0 Hz, methylene-CH), 3.01 (s, 2H, acetylene-CH) 2.36 (s, 6H, methyl-CH); <sup>13</sup>C NMR (150 MHz, DMSO-d<sub>6</sub>): δ = 146.86, 133.26, 132.44, 128.18, 116.96, 83.44, 75.95, 67.31, 54.69, 16.64.

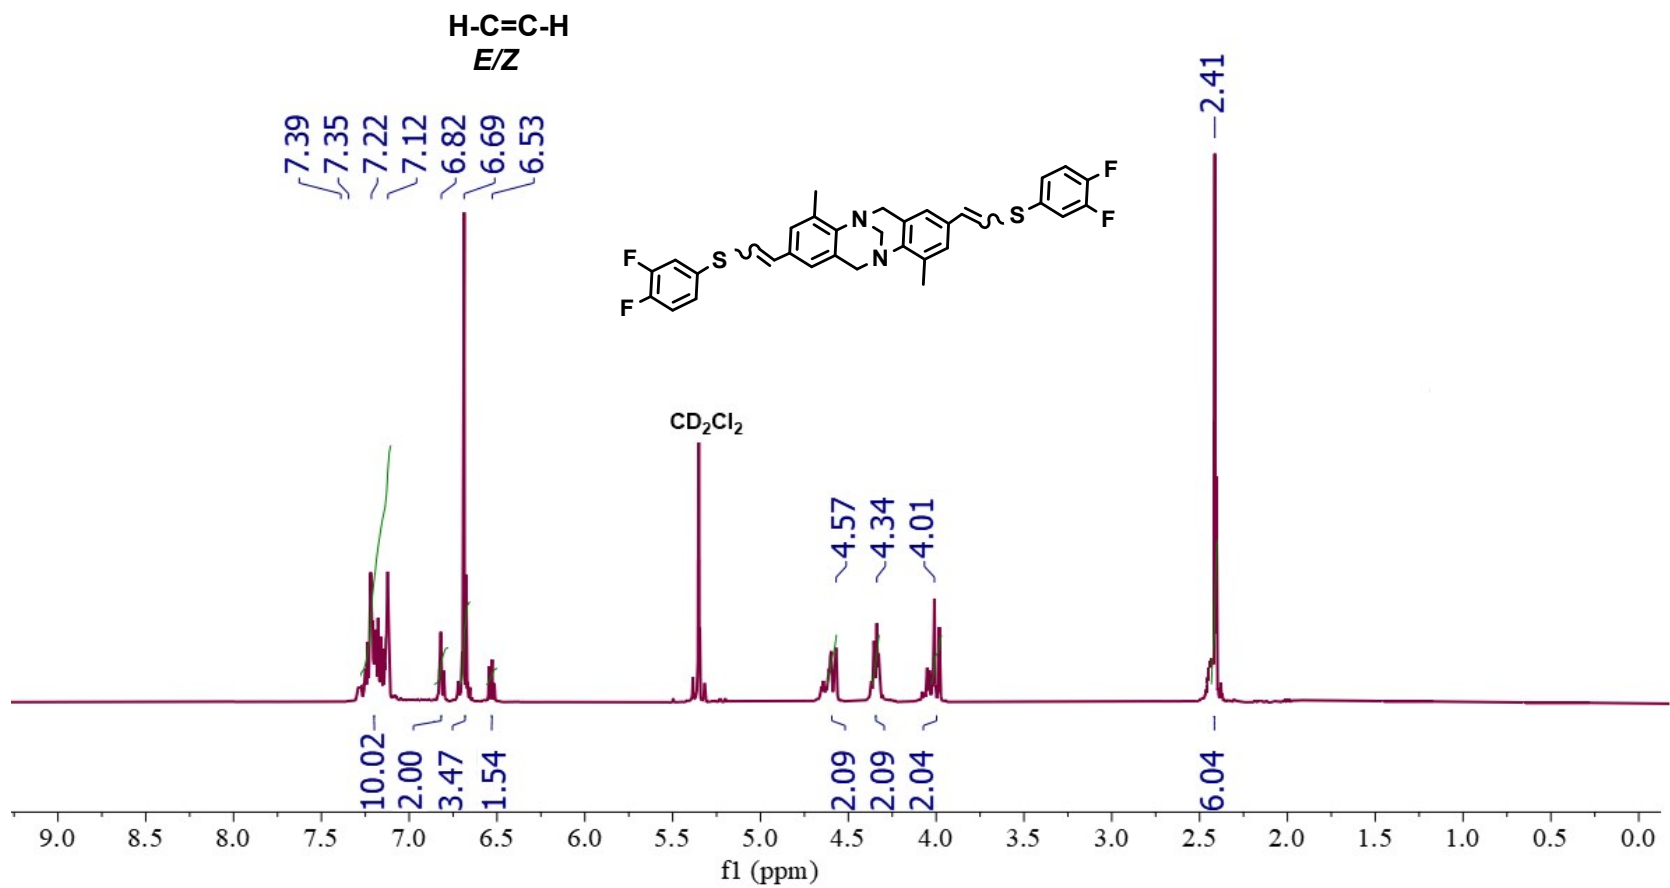

**Figure S1:** <sup>1</sup>H NMR spectrum of **TB-S** (CD<sub>2</sub>Cl<sub>2</sub>, 600 MHz)

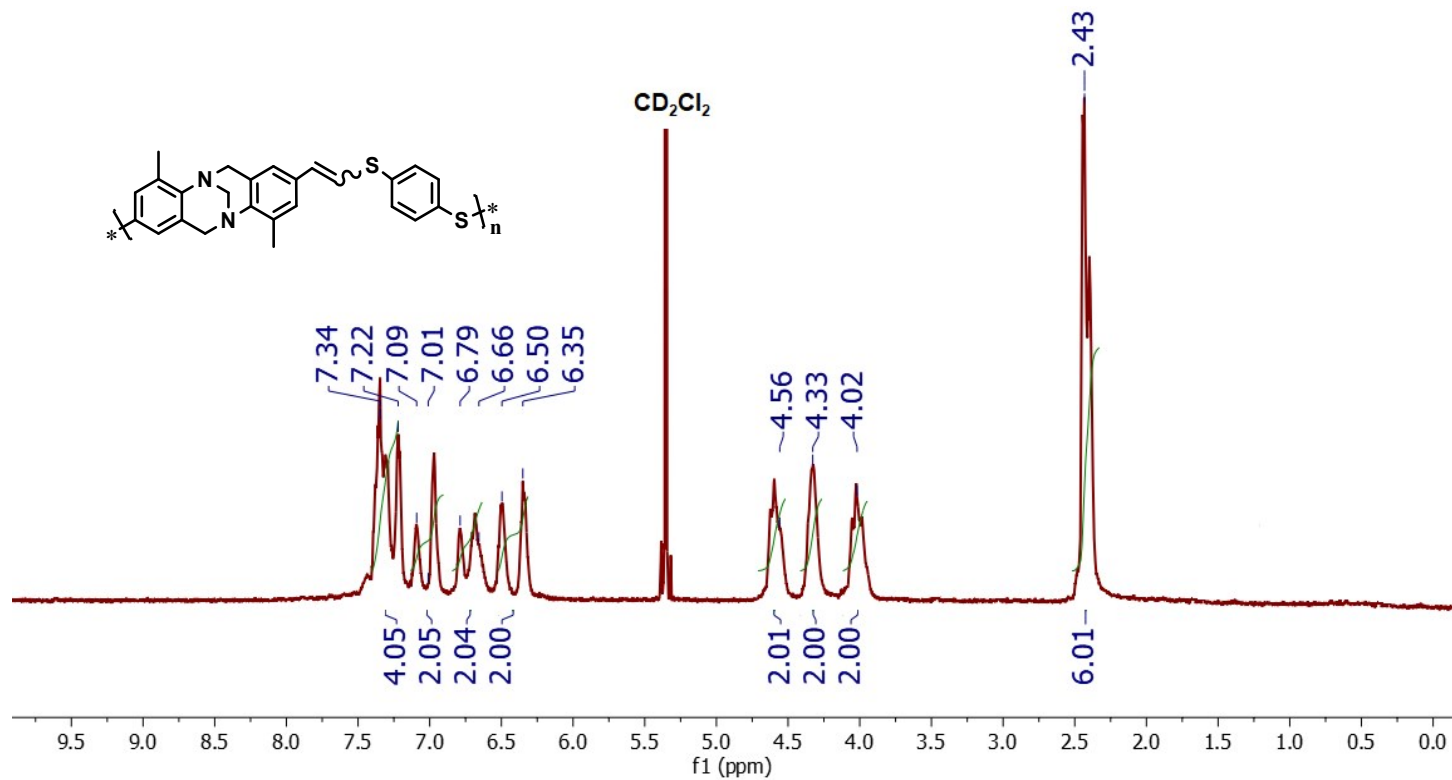

**Figure S2:** <sup>1</sup>H NMR spectrum of **TCP1** (CD<sub>2</sub>Cl<sub>2</sub>, 600 MHz)

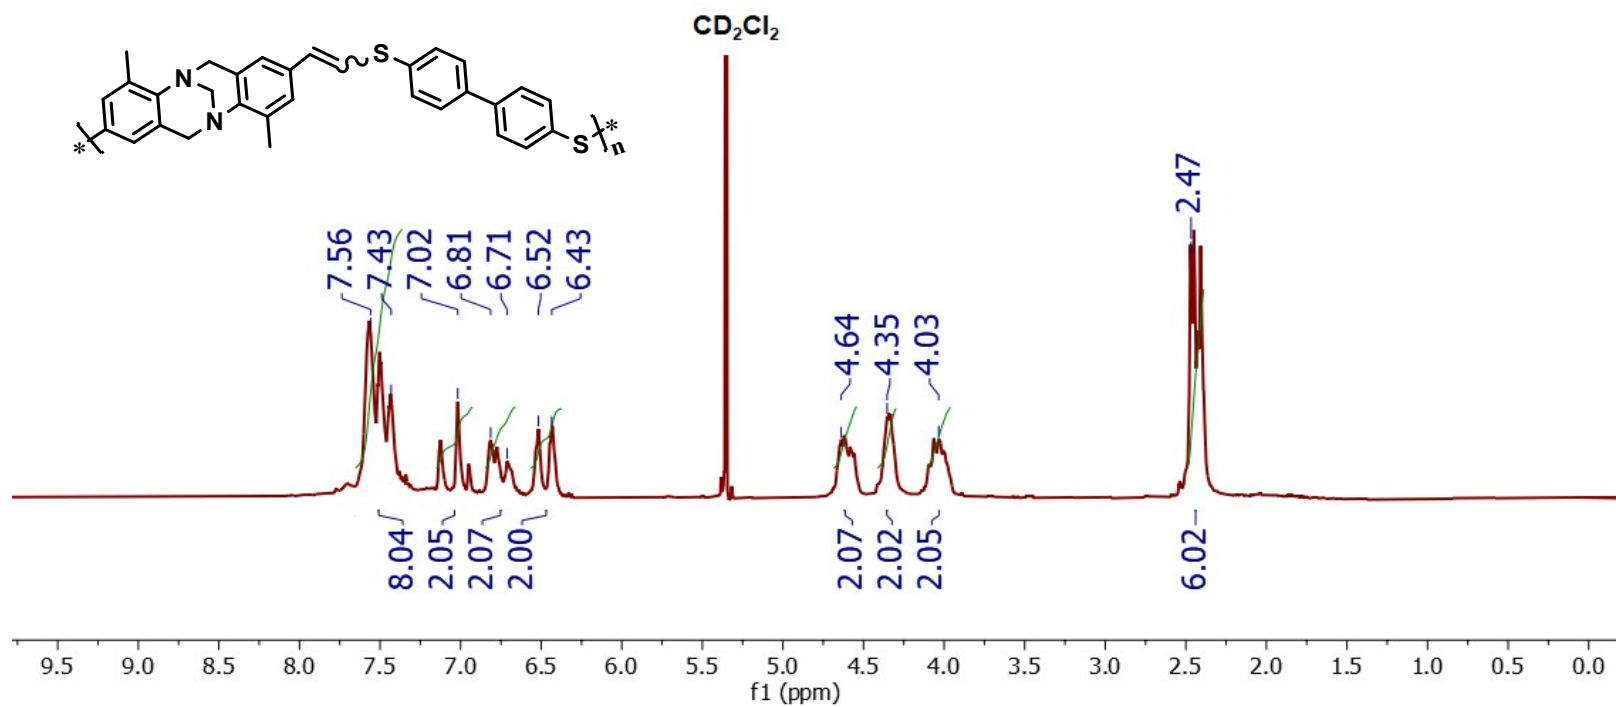

**Figure S3:** <sup>1</sup>H NMR spectrum of TCP2 (CD<sub>2</sub>Cl<sub>2</sub>, 600 MHz)

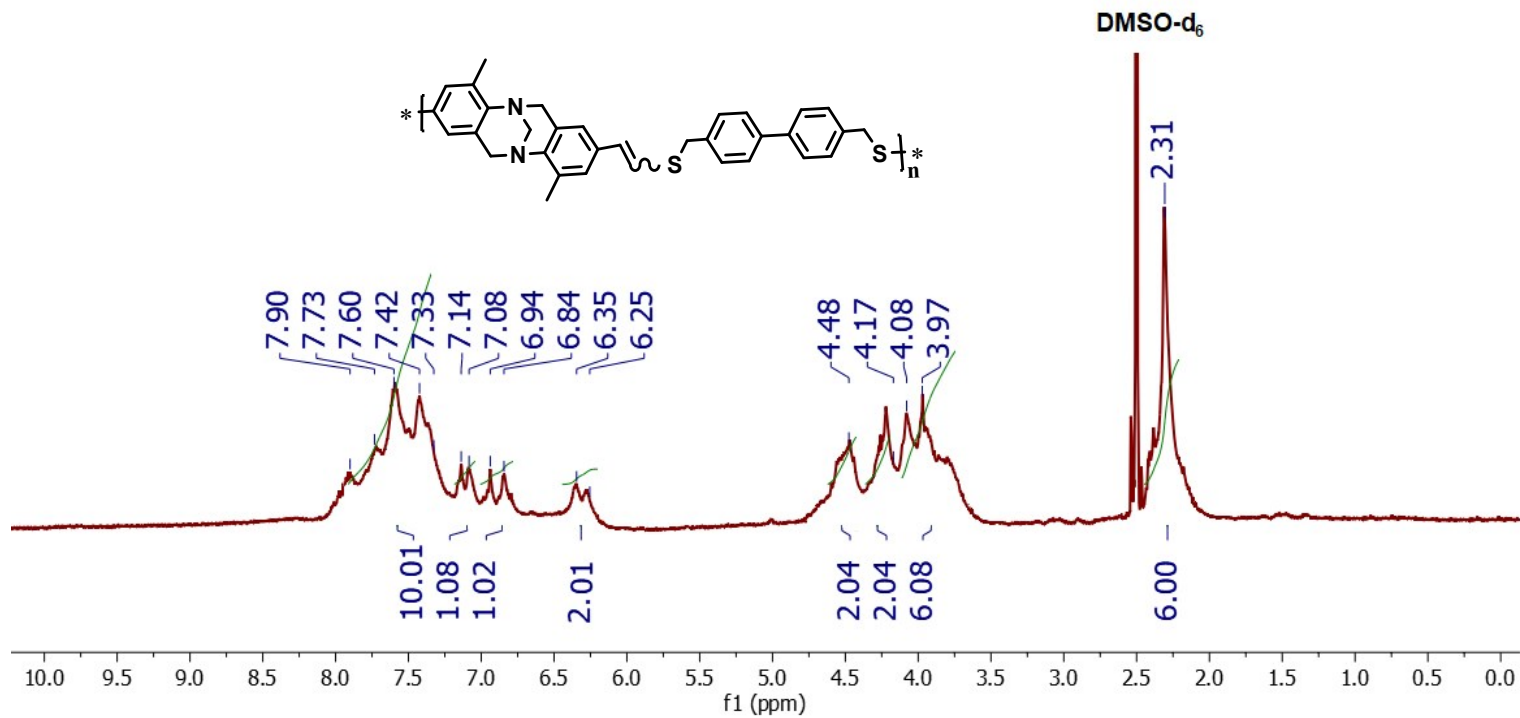

**Figure S4:**  $^1\text{H}$  NMR spectrum of TCP3 (DMSO- $\text{d}_6$ , 600 MHz)



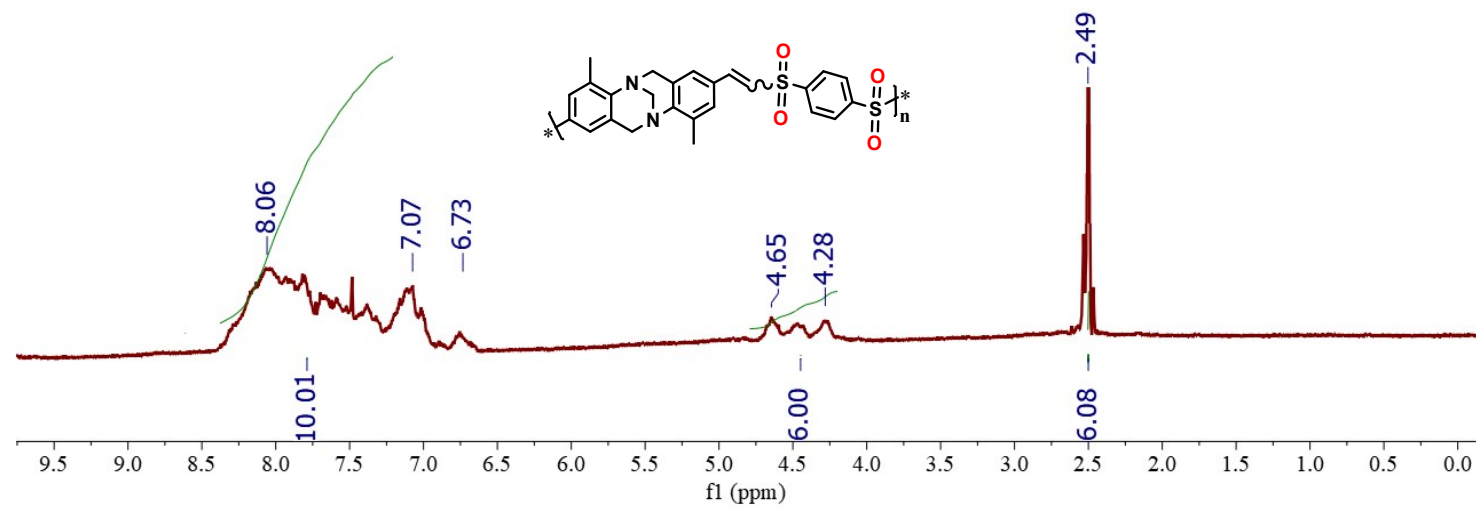

**Figure S5:**  $^1\text{H}$  NMR spectrum of **TCP4** (DMSO- $d_6$ , 600 MHz)

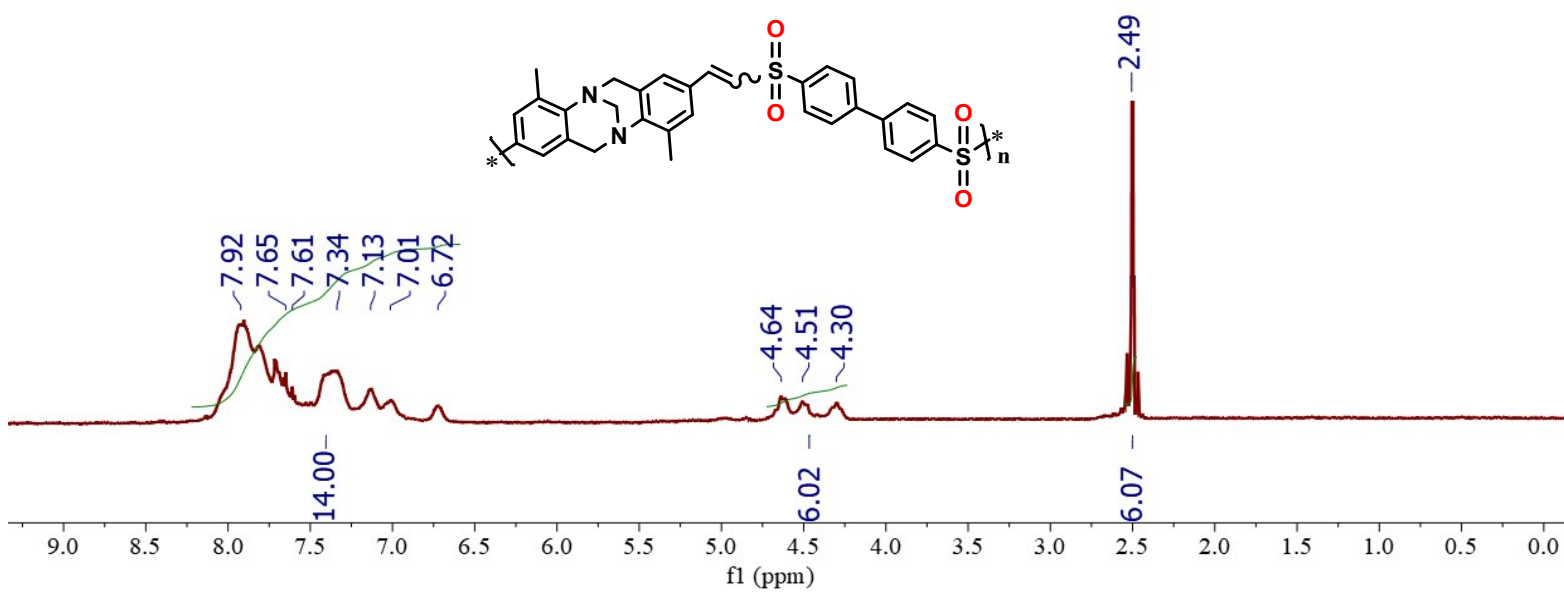

**Figure S6:** <sup>1</sup>H NMR spectrum of **TCP5** (DMSO-d<sub>6</sub>, 600 MHz)

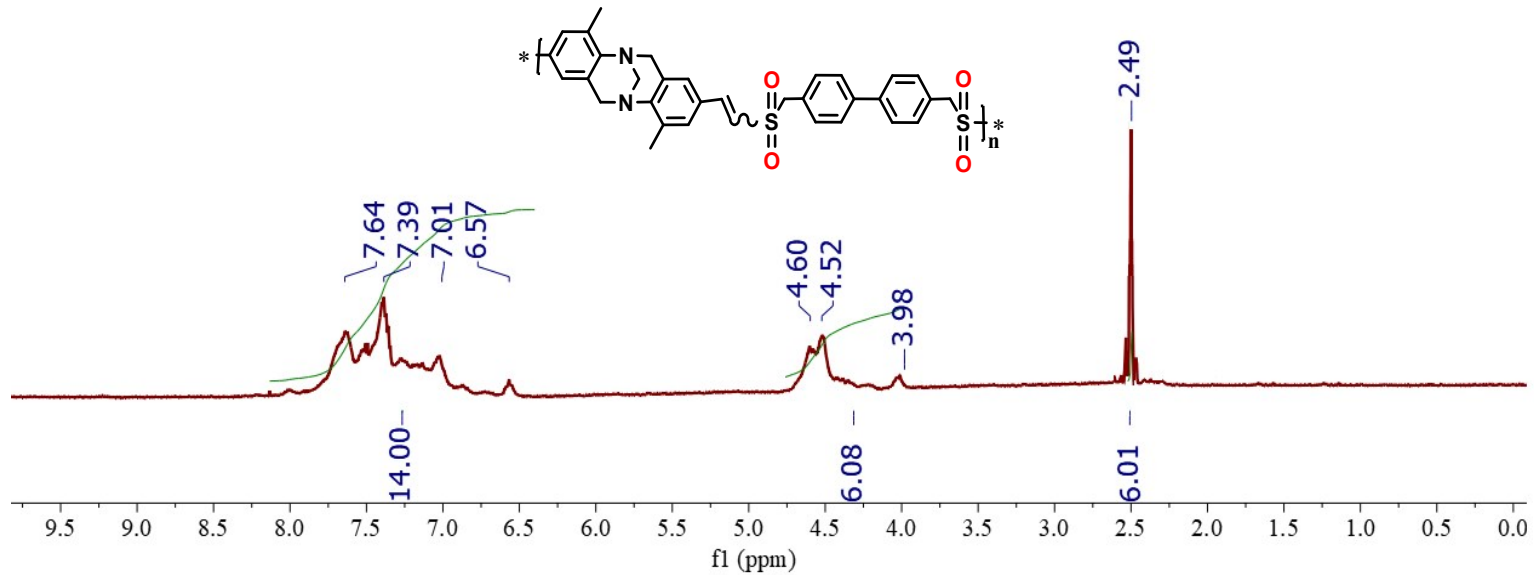

**Figure S7:** <sup>1</sup>H NMR spectrum of TCP6 (DMSO-d<sub>6</sub>, 600 MHz)

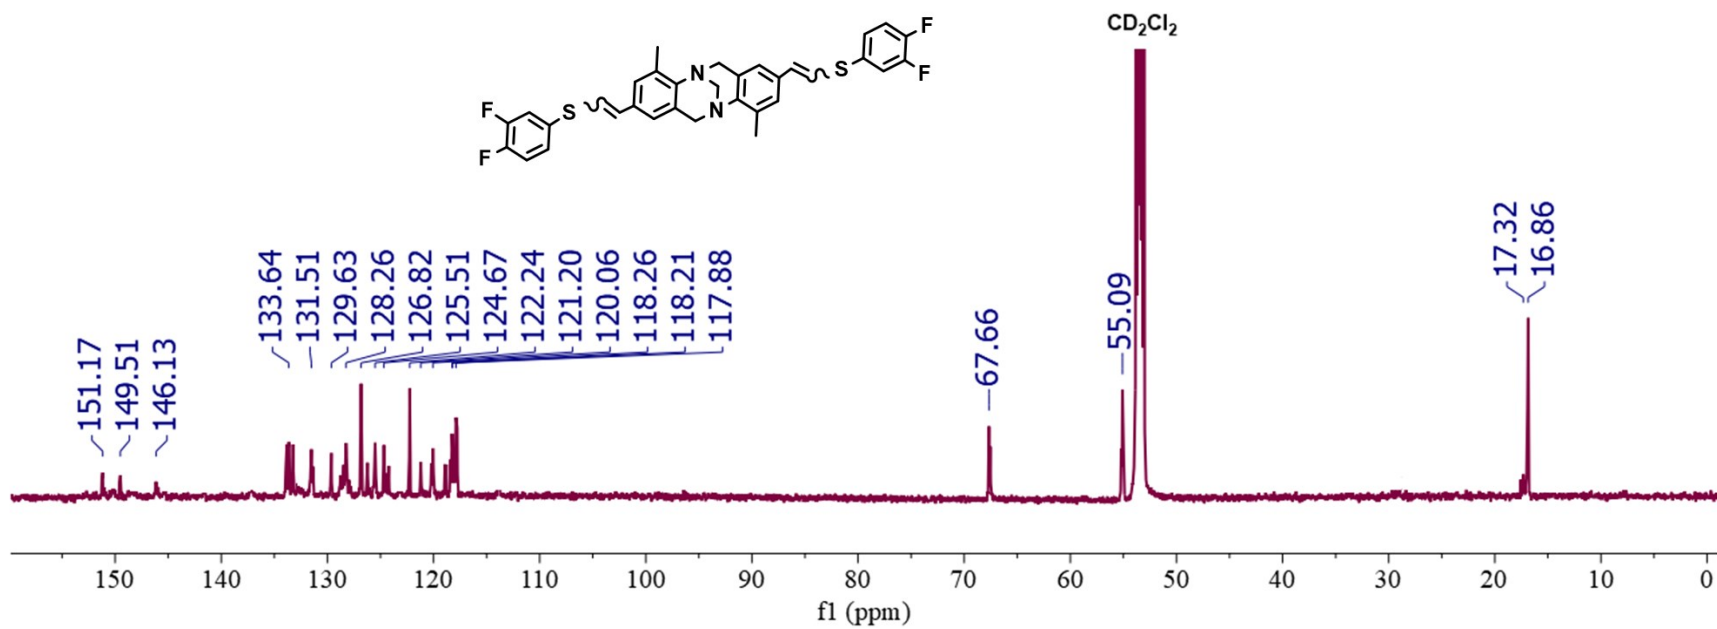

**Figure S8:**  $^{13}\text{C}$  NMR spectrum of **TB-S** (CD<sub>2</sub>Cl<sub>2</sub>, 150 MHz)

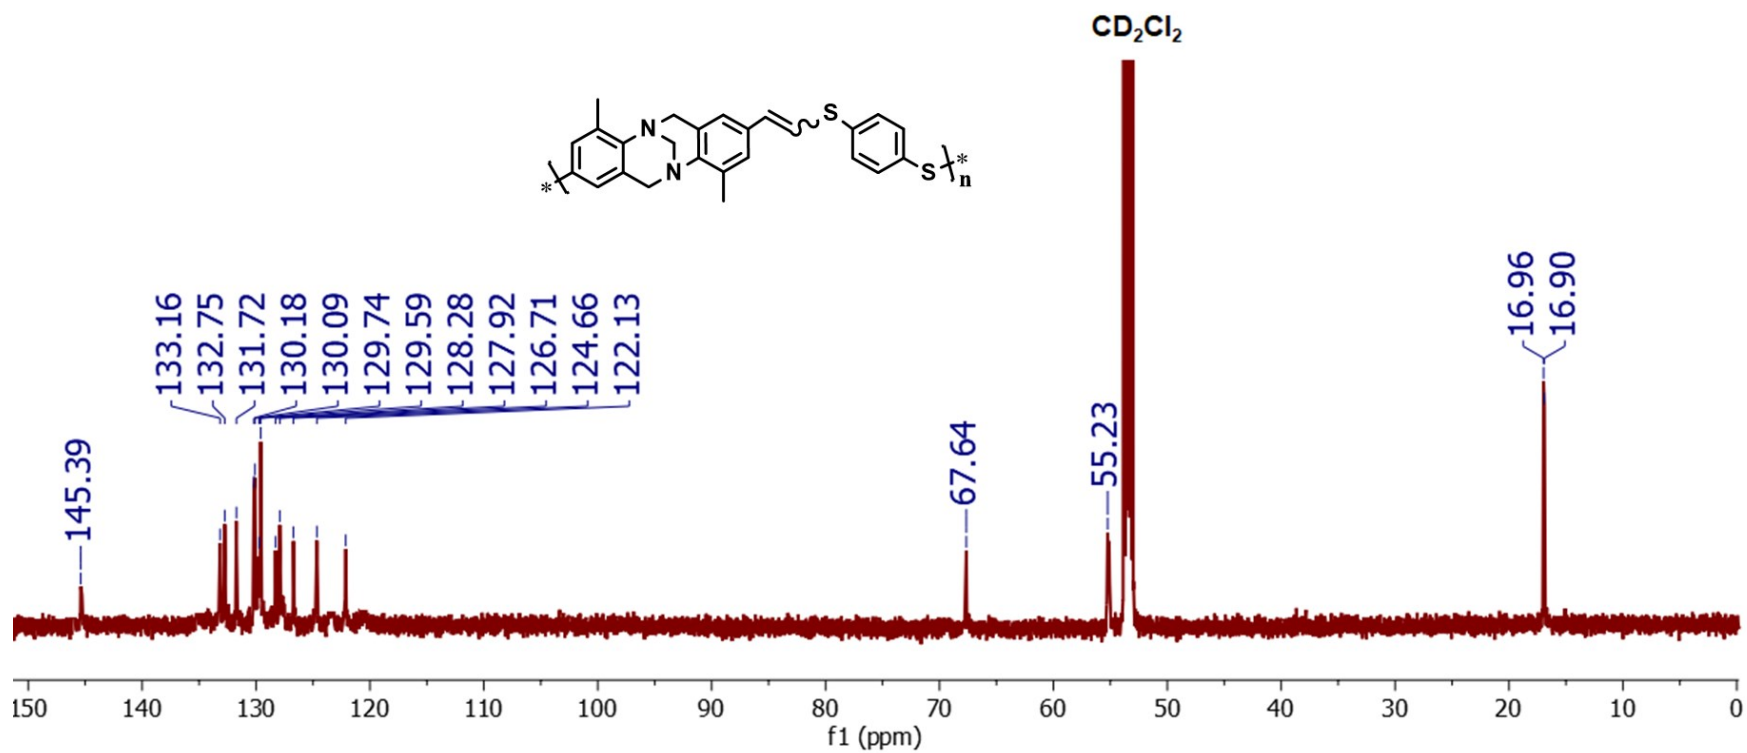

**Figure S9:**  $^{13}\text{C}$  NMR spectrum of TCP1 ( $\text{CD}_2\text{Cl}_2$ , 150 MHz)

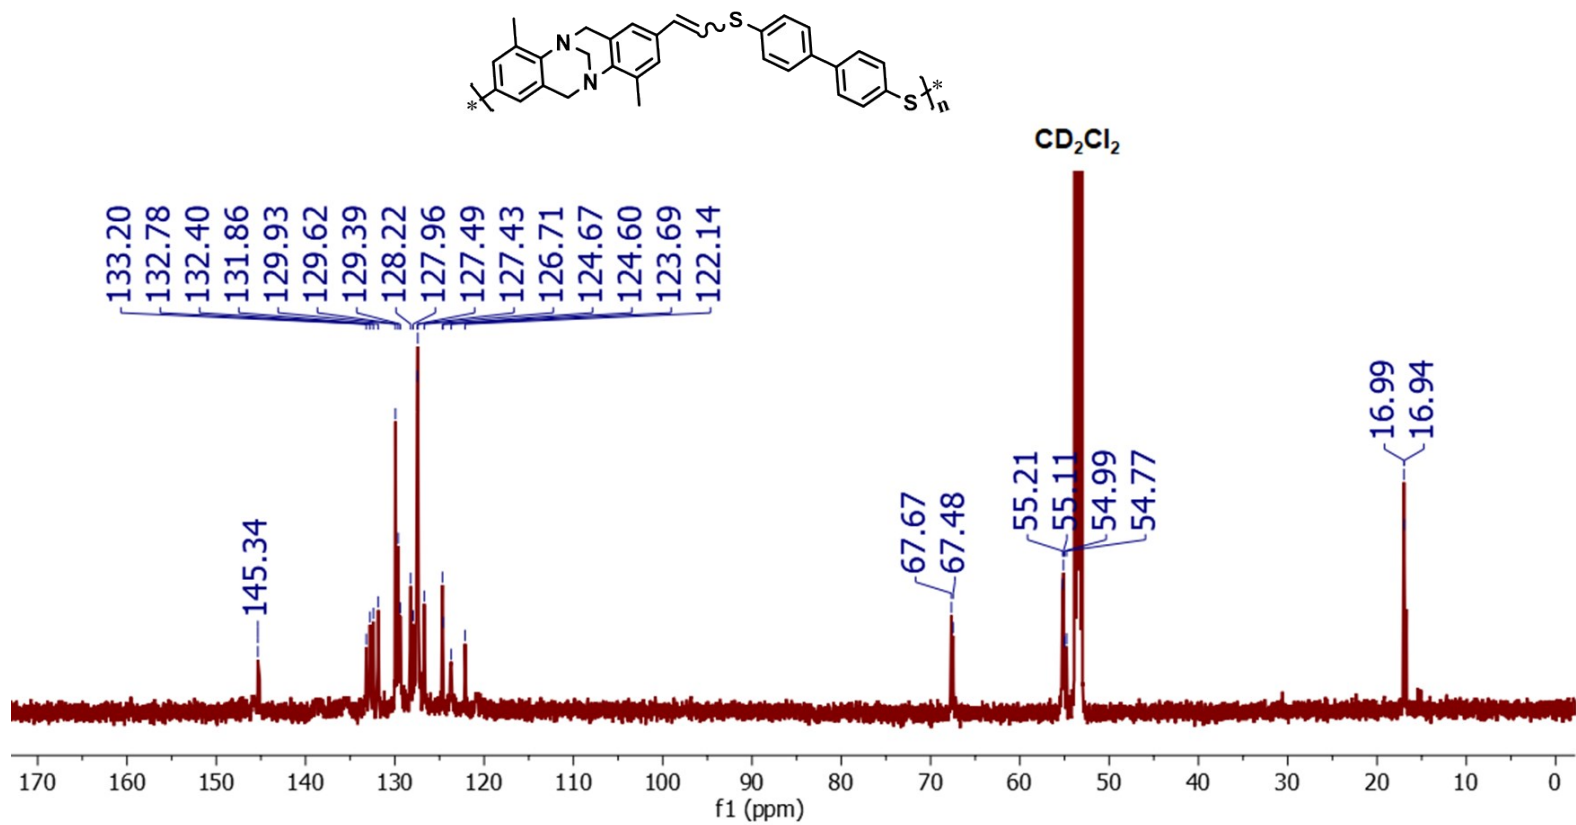

Figure S10: <sup>13</sup>C NMR spectrum of TCP2 (CD<sub>2</sub>Cl<sub>2</sub>, 150 MHz)

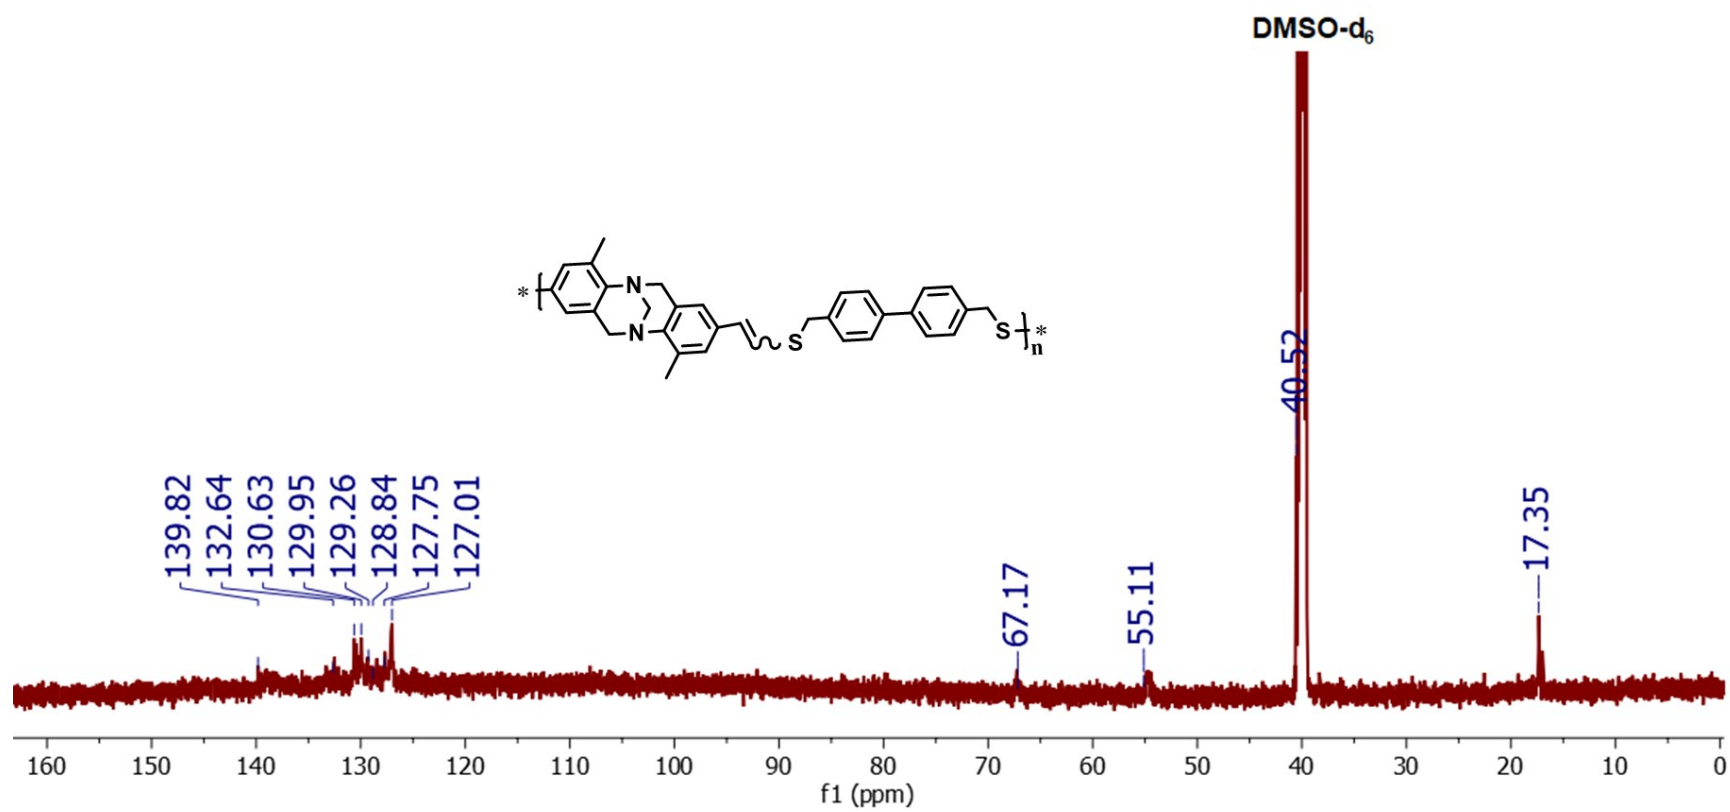

**Figure S11:**  $^{13}\text{C}$  NMR spectrum of TCP3 ( $\text{DMSO-d}_6$ , 150 MHz)

$M_n = 2840$   
 $M_w = 8675$   
 $\bar{D} = 3.0$

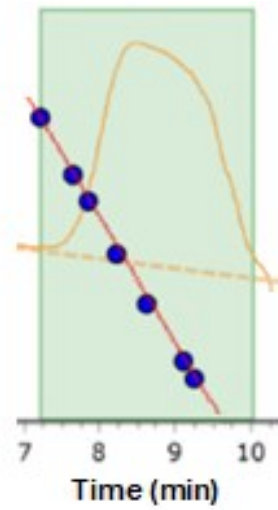

**Figure S12:** GPC of TCP1



$M_n = 2732$   
 $M_w = 7796$   
 $\bar{D} = 2.8$

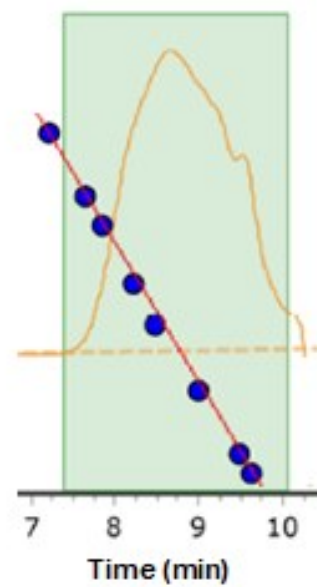

**Figure S13:** GPC of TCP2

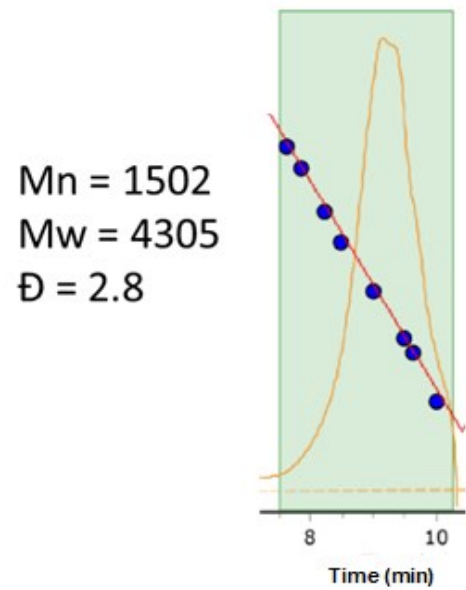

**Figure S14:** GPC of TCP3

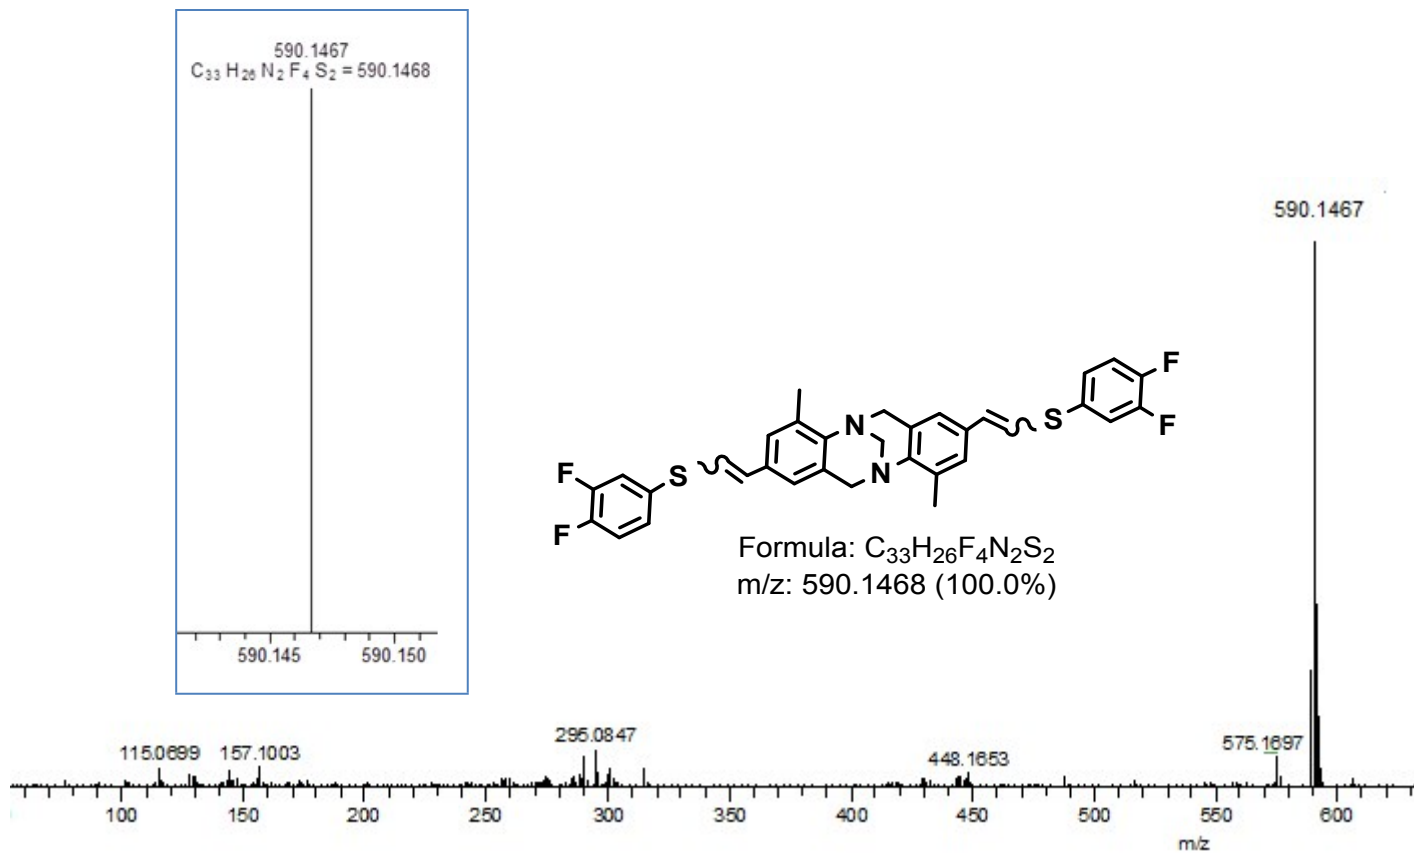

Figure S15: EI-HRMS of TB-S

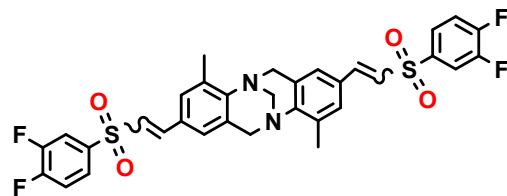

Formula:  $C_{33}H_{26}O_4N_2F_4S_2$   
m/z: 654.1265 (100.0%)

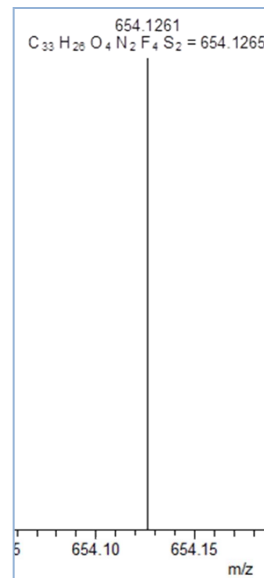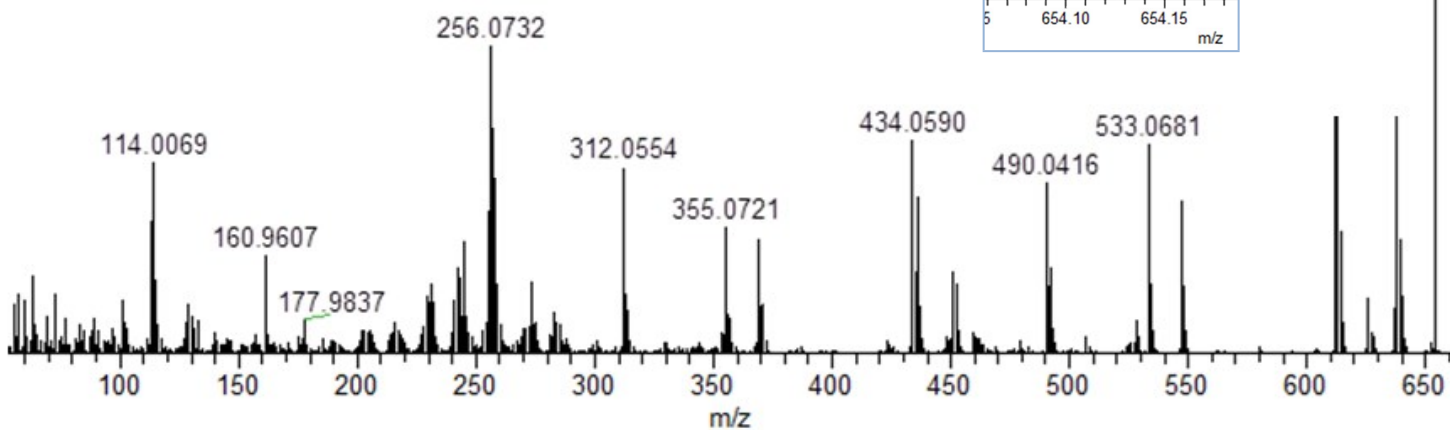

Figure S16: EI-MS of TB-SO2

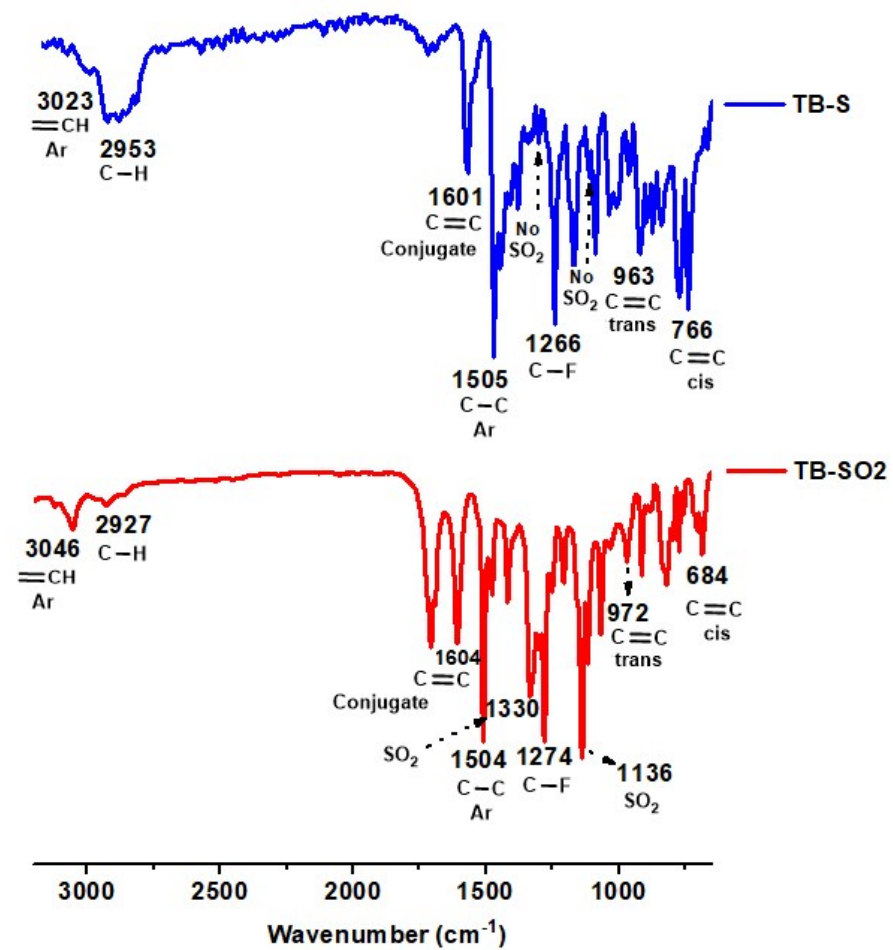

Figure S17: Comparative FT-IR spectra of TB-S and TB-SO<sub>2</sub>

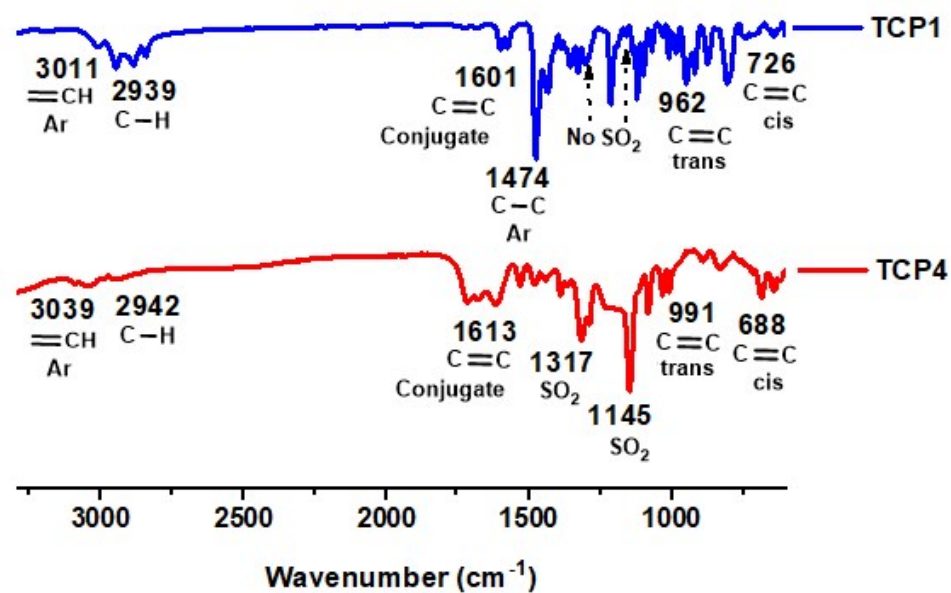

Figure S18: Comparative FT-IR spectra of TCP1 and TCP4

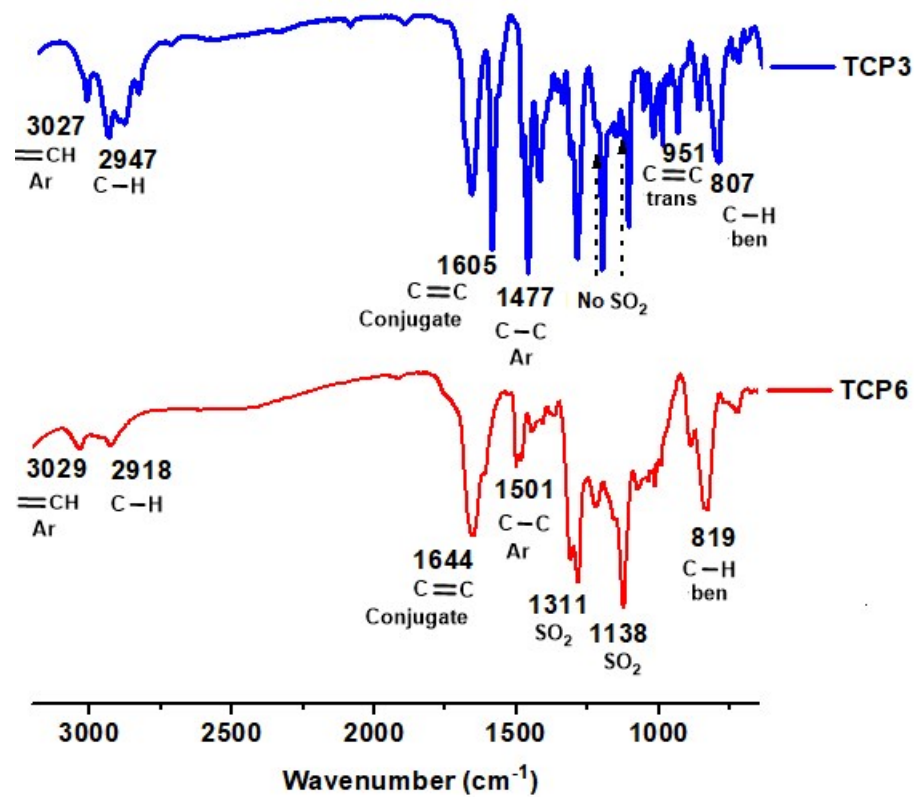

Figure S19: Comparative FT-IR spectra of TCP3,6

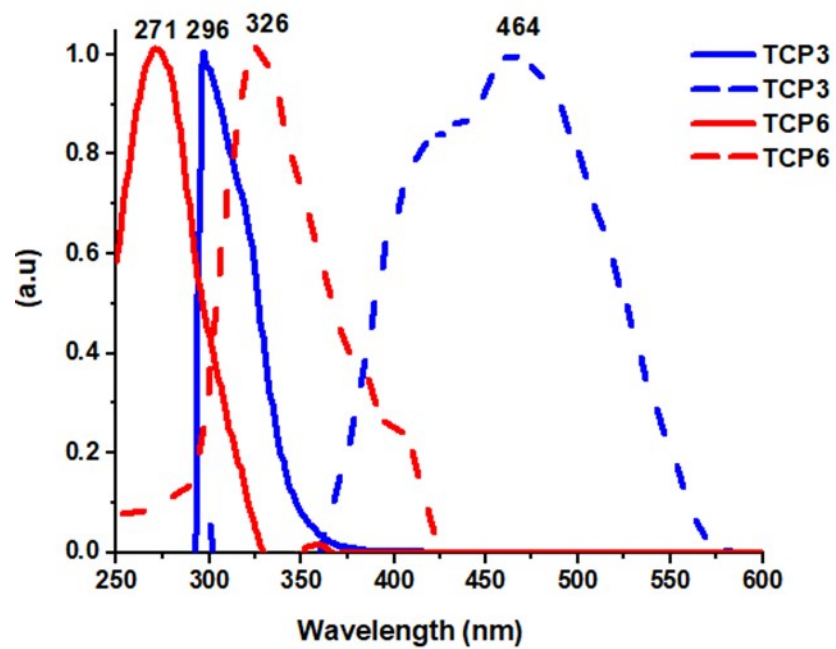

**Figure S20:** Normalized UV-VIS absorption ( $C_M = 10^{-7}$  M in THF, solid lines) and emission ( $C_M = 10^{-8}$  M in THF, dotted lines) spectra of **TCP3,6** (absorption maxima were used as the excitation wavelengths).



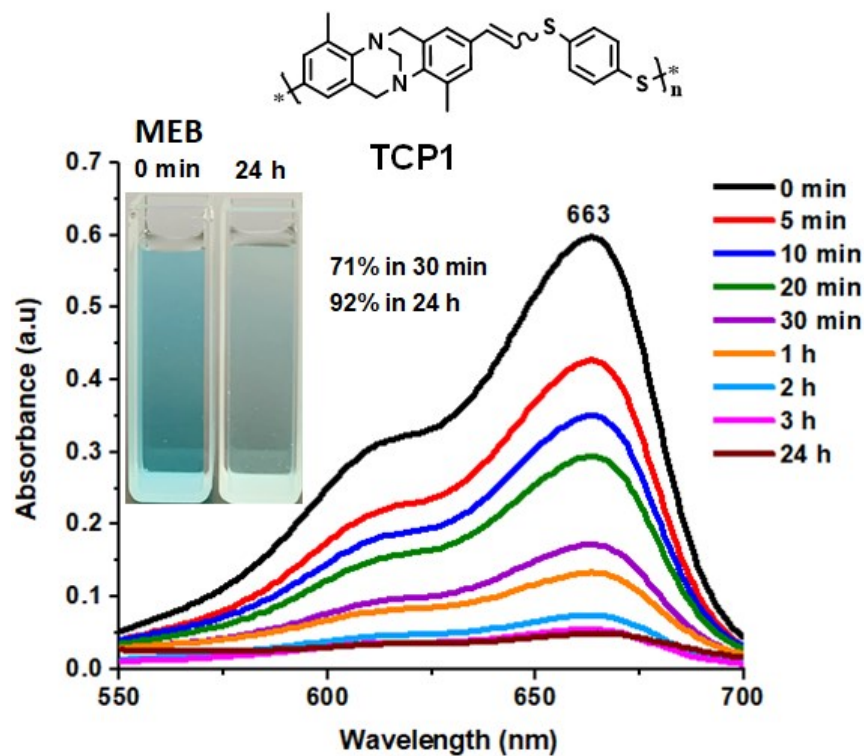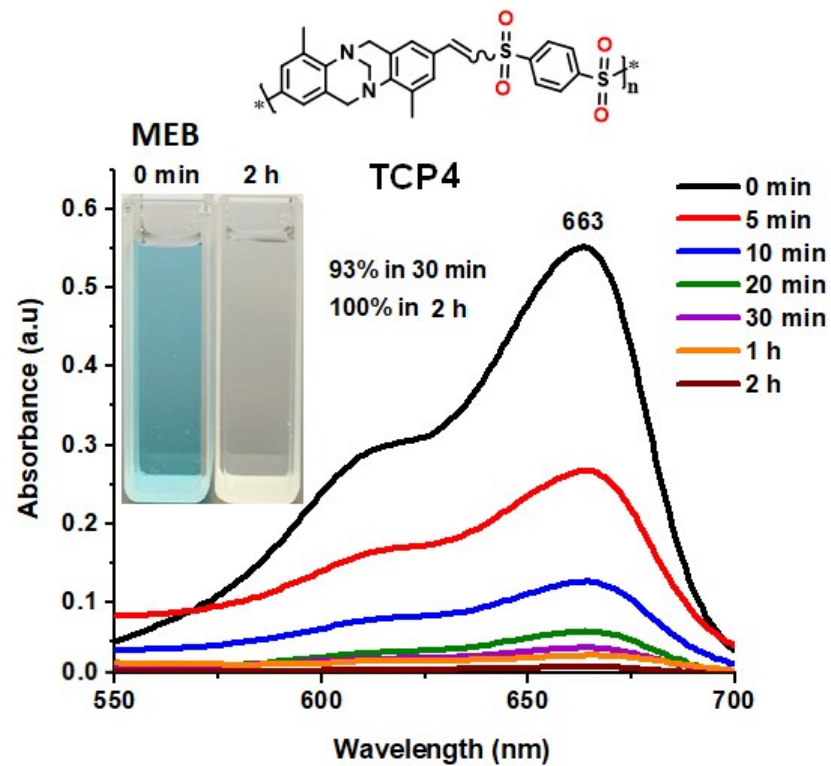

**Figure S21:** Methylene blue (MEB) dye adsorption by **TCP1,4** at various time intervals

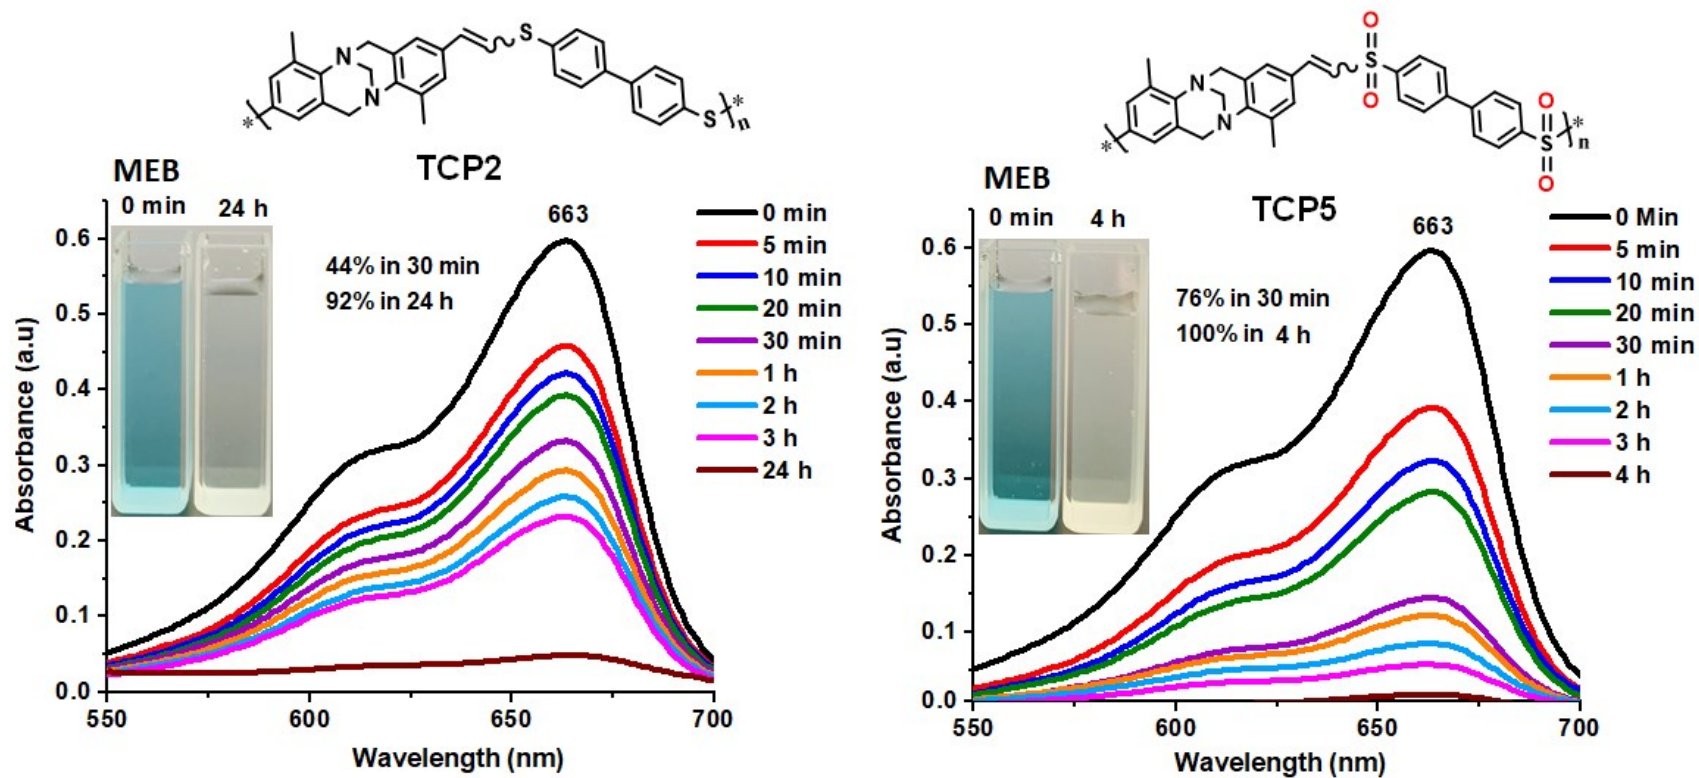

**Figure S22:** Methylene blue (MEB) dye adsorption by **TCP2,5** at various time intervals

**Table S1** Summary of dye adsorption by copolymers **TCP1-6**

| Entry | Adsorbent | Dye | % Adsorption | Time   |
|-------|-----------|-----|--------------|--------|
| 1     | TCP1      | CR  | 27           | 24 h   |
| 2     | TCP1      | MO  | 5            | 24 h   |
| 3     | TCP1      | MB  | 45           | 24 h   |
| 4     | TCP1      | MEB | 71           | 30 min |
| 5     | TCP1      | MEB | 92           | 24 h   |
| 6     | TCP2      | MEB | 44           | 30 min |
| 7     | TCP2      | MEB | 92           | 24 h   |
| 8     | TCP3      | MEB | 25           | 30 min |
| 9     | TCP3      | MEB | 45           | 24 h   |
| 10    | TCP4      | MEB | 93           | 30 min |
| 11    | TCP4      | MEB | 100          | 2 h    |
| 12    | TCP5      | MEB | 76           | 30 min |
| 13    | TCP5      | MEB | 100          | 4 h    |
| 14    | TCP6      | MEB | 84           | 30 min |
| 15    | TCP6      | MEB | 100          | 4 h    |

**Table S2** Comparison of percentage removal of MEB with different adsorbents

| Entry | Adsorbent                                                     | % Removal | Ref                                                                                                              |
|-------|---------------------------------------------------------------|-----------|------------------------------------------------------------------------------------------------------------------|
| 1     | Tröger Base-Containing Sulfone Copolymers                     | 100       | This work                                                                                                        |
| 2     | GO-HBE/PES membrane                                           | 85.9      | M. Mahmoudian <i>et. al.</i> , <i>Polymer</i> , 2021, <b>224</b> , 123693.                                       |
| 3     | Chitosan cross-linked graphene oxide/lignosulfonate composite | >99       | M. Yan, <i>et. al.</i> , <i>International Journal of Biological Macromolecules</i> , 2019, <b>136</b> , 927-935. |
| 4     | Chitosan-derived three-dimensional porous carbon              | >93.4     | Q. Jin, <i>et. al.</i> , <i>RSC Advances</i> , 2018, <b>8</b> , 1255-1264.                                       |
| 5     | PSf/GO membrane                                               | 84        | L. Badrinezhad, S. <i>et. al.</i> , <i>Polymer Bulletin</i> , 2018, <b>75</b> , 469-484.                         |
| 6     | GO-PDADMC/PSf membrane                                        | 63        | M. G. Kochameshki, <i>et. al.</i> , <i>Chemical Engineering Journal</i> , 2017, <b>309</b> , 206-221.            |

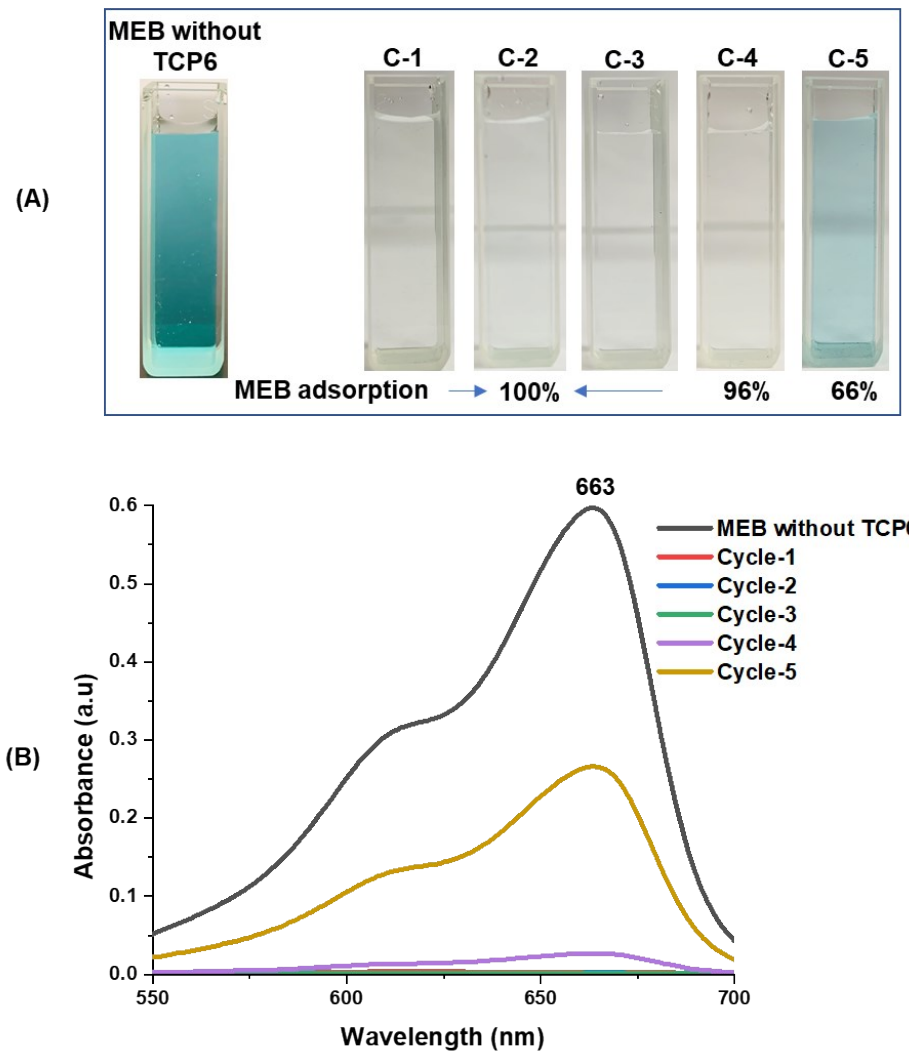

**Figure S23:** Reusability of **TCP6** on Methylene blue (MEB) dye adsorption up to 5 cycles(C1-5): (A) photographs showing the color change up on each cycle (B) UV-Vis spectrum after each cycle
